# Supplementary material for: Maternal C-Peptide and Insulin Sensitivity, but Not BMI, Associate with Fatty Acids in the First Trimester of Pregnancy
Source: MDPI journal article supplement (doi:10.3390/ijms221910422), 2021-09-27

**Table S1.** Associations between individual BMI, leptin, glucose, C-peptide and IS<sub>HOMA</sub> and SFA (A), MUFA (B), *n*-3 PUFA (C) and *n*-6 PUFA (D).

A) SFA

| <i>Predictors</i>             | <b>C 14:0 <sup>a</sup></b> |                      |              | <b>C 16:0 <sup>a</sup></b> |                      |              | <b>C 18:0</b> |                |          |
|-------------------------------|----------------------------|----------------------|--------------|----------------------------|----------------------|--------------|---------------|----------------|----------|
|                               | <i>β</i>                   | <i>CI</i>            | <i>p</i>     | <i>β</i>                   | <i>CI</i>            | <i>p</i>     | <i>β</i>      | <i>CI</i>      | <i>p</i> |
| BMI < 25 kg/m <sup>2</sup>    | ref                        |                      |              | ref                        |                      |              | ref           |                |          |
| BMI 25-29.9 kg/m <sup>2</sup> | <b>-0.20</b>               | <b>-0.39 – -0.01</b> | <b>0.037</b> | -0.06                      | -0.14 – 0.03         | 0.200        | 13.45         | -4.69 – 31.69  | 0.144    |
| BMI ≥ 30 kg/m <sup>2</sup>    | -0.11                      | -0.45 – 0.21         | 0.488        | -0.05                      | -0.16 – 0.10         | 0.520        | -0.61         | -32.10 – 30.88 | 0.969    |
| Leptin < 8.5 ng/ml            | ref                        |                      |              | ref                        |                      |              | ref           |                |          |
| Leptin 8.5-15.3 ng/ml         | -0.07                      | -0.13 – 0.27         | 0.496        | -0.02                      | -0.11 – 0.07         | 0.704        | -8.09         | -27.57 – 11.40 | 0.413    |
| Leptin ≥ 15.3 ng/ml           | -0.51                      | -0.15 – 0.26         | 0.617        | -0.02                      | -0.11 – - 0.08       | 0.747        | -109          | -20.70 – 18.52 | 0.913    |
| Glucose < 4.28 mmol/l         | ref                        |                      |              | ref                        |                      |              | ref           |                |          |
| Glucose 4.28-4.97 mmol/l      | 0.06                       | -0.14 – 0.26         | 0.530        | -0.01                      | -0.10 – 0.08         | 0.772        | 3.17          | -16.12 – 22.46 | 0.745    |
| Glucose ≥ 4.97 mmol/l         | -0.15                      | -0.38 – 0.09         | 0.220        | <b>-0.11</b>               | <b>-0.22 – -0.01</b> | <b>0.032</b> | -10.60        | -33.23 – 12.03 | 0.355    |
| C-peptide < 315.4 pmol/l      | ref                        |                      |              | ref                        |                      |              | ref           |                |          |
| C-peptide 315.4–437.8 pmol/l  | 0.17                       | -0.03 – 0.37         | 0.089        | 0.03                       | -0.06 – 0.12         | 0.572        | -4.23         | -23.62 – 15.15 | 0.666    |
| C-peptide ≥ 437.8 pmol/l      | 0.04                       | -0.16 – 0.25         | 0.675        | -0.05                      | -0.14 – 0.05         | 0.314        | -20.08        | -21.84 – 17.83 | 0.841    |
| IS <sub>HOMA</sub> ≤ 0.59     | -0.05                      | -0.26 – 0.17         | 0.664        | -0.10                      | -0.19 – 0.00         | 0.053        | -10.68        | -31.46 – 10.10 | 0.311    |
| IS <sub>HOMA</sub> 0.58-0.85  | -0.05                      | -0.26 – 0.16         | 0.643        | -0.02                      | -0.11 – 0.08         | 0.710        | -5.70         | -26.06 – 14.67 | 0.580    |
| IS <sub>HOMA</sub> > 0.85     | ref                        |                      |              | ref                        |                      |              | ref           |                |          |

B) MUFA

| <i>Predictors</i>             | <b>C 16:1<sup>a</sup></b> |              |          | <b>C 18:1 (n-9)</b> |                 |          | <b>C 22:1 (n-9)</b> |              |          |
|-------------------------------|---------------------------|--------------|----------|---------------------|-----------------|----------|---------------------|--------------|----------|
|                               | $\beta$                   | <i>CI</i>    | <i>p</i> | $\beta$             | <i>CI</i>       | <i>p</i> | $\beta$             | <i>CI</i>    | <i>p</i> |
| BMI < 25 kg/m <sup>2</sup>    | ref                       |              |          | ref                 |                 |          | ref                 |              |          |
| BMI 25-29.9 kg/m <sup>2</sup> | 0.01                      | -0.16 – 0.19 | 0.932    | -28.40              | -75.47 – 18.67  | 0.235    | -0.71               | -1.90 – 0.48 | 0.239    |
| BMI ≥ 30 kg/m <sup>2</sup>    | 0.14                      | -0.18 – 0.46 | 0.379    | 25.31               | -56.17 – 106.78 | 0.540    | 0.86                | -1.20 – 2.92 | 0.411    |
| Leptin < 8.5 ng/ml            | ref                       |              |          | ref                 |                 |          | ref                 |              |          |
| Leptin 8.5-15.3 ng/ml         | 0.11                      | -0.09 – 0.30 | 0.268    | -1.90               | -52.29 – 48.49  | 0.941    | 0.17                | -1.11 – 1.44 | 0.798    |
| Leptin ≥ 15.3 ng/ml           | 0.16                      | -0.04 – 0.35 | 0.114    | 17.25               | -33.47 – 67.97  | 0.502    | 0.28                | -1.01 – 1.57 | 0.667    |
| Glucose < 4.28 mmol/l         | ref                       |              |          | ref                 |                 |          | ref                 |              |          |
| Glucose 4.28-4.97 mmol/l      | 0.11                      | -0.08 – 0.30 | 0.256    | -18.73              | -68.64 – 31.18  | 0.459    | -0.68               | -1.93 – 0.57 | 0.283    |
| Glucose ≥ 4.97 mmol/l         | -0.17                     | -0.40 – 0.05 | 0.126    | -43.60              | -102.16 – 14.95 | 0.143    | 0.89                | -0.57 – 2.36 | 0.229    |
| C-peptide < 315.4 pmol/l      | ref                       |              |          | ref                 |                 |          | ref                 |              |          |
| C-peptide 315.4–437.8 pmol/l  | 0.19                      | -0.01 – 0.38 | 0.053    | 18.32               | -31.48 – 68.13  | 0.468    | -0.45               | -1.71 – 0.82 | 0.486    |
| C-peptide ≥ 437.8 pmol/l      | 0.05                      | -0.15 – 0.25 | 0.610    | -14.31              | -65.27 – 36.65  | 0.579    | -0.32               | -1.62 – 0.97 | 0.622    |
| IS <sub>HOMA</sub> ≤ 0.59     | -0.06                     | -0.27 – 0.15 | 0.594    | -40.13              | -93.90 – 13.64  | 0.142    | -0.21               | -1.58 – 1.17 | 0.768    |
| IS <sub>HOMA</sub> 0.58-0.85  | 0.00                      | -0.21 – 0.20 | 0.967    | -16.39              | -69.09 – 36.30  | 0.539    | -0.79               | -2.13 – 0.56 | 0.249    |
| IS <sub>HOMA</sub> > 0.85     | ref                       |              |          | ref                 |                 |          | ref                 |              |          |

C) *n*-3 PUFA

| <i>Predictors</i>             | <b>C 18:3 (<i>n</i>-3)<sup>a</sup></b> |               |          | <b>C 20:3 (<i>n</i>-3)<sup>a</sup></b> |                      |               | <b>C 20:5 (<i>n</i>-3)</b> |                      |              |
|-------------------------------|----------------------------------------|---------------|----------|----------------------------------------|----------------------|---------------|----------------------------|----------------------|--------------|
|                               | $\beta$                                | <i>CI</i>     | <i>p</i> | $\beta$                                | <i>CI</i>            | <i>p</i>      | $\beta$                    | <i>CI</i>            | <i>p</i>     |
| BMI < 25 kg/m <sup>2</sup>    | ref                                    |               |          | ref                                    |                      |               | ref                        |                      |              |
| BMI 25-29.9 kg/m <sup>2</sup> | -0.09                                  | -0.25 – 0.07  | 0.291    | 0.20                                   | -0.06 – 0.46         | 0.128         | 0.25                       | -2.79 – 3.29         | 0.869        |
| BMI ≥ 30 kg/m <sup>2</sup>    | 0.04                                   | -0.24 – 0.31  | 0.794    | -0.11                                  | -0.54 – 0.34         | 0.638         | -0.10                      | -5.36 – 5.17         | 0.971        |
| Leptin < 8.5 ng/ml            | ref                                    |               |          | ref                                    |                      |               | ref                        |                      |              |
| Leptin 8.5-15.3 ng/ml         | 0.02                                   | -0.15 – 0.20  | 0.778    | 0.04                                   | -0.24 – 0.31         | 0.779         | -0.56                      | -3.78 – 2.65         | 0.729        |
| Leptin ≥ 15.3 ng/ml           | 0.08                                   | -0.09 – 0.26  | 0.339    | 0.19                                   | -0.08 – 0.47         | 0.167         | -2.12                      | -5.35 – 1.12         | 0.197        |
| Glucose < 4.28 mmol/l         | ref                                    |               |          | ref                                    |                      |               | ref                        |                      |              |
| Glucose 4.28-4.97 mmol/l      | 0.01                                   | -0.16 – 0.18  | 0.916    | -0.10                                  | -0.36 – 0.19         | 0.520         | -                          | -3.67 – 2.75         | 0.778        |
| Glucose ≥ 4.97 mmol/l         | 0.02                                   | -0.18 – 0.22  | 0.842    | -0.20                                  | -0.34 – 0.30         | 0.901         | 0.458<br>1,121             | -2.65 – 4.89         | 0.557        |
| C-peptide < 315.4 pmol/l      | ref                                    |               |          | ref                                    |                      |               | ref                        |                      |              |
| C-peptide 315.4–437.8 pmol/l  | 0.05                                   | -0.12 – 0.22  | 0.569    | <b>-0.46</b>                           | <b>-0.71 – -0.19</b> | <b>0.001*</b> | -2.48                      | -5.63 – 0.67         | 0.122        |
| C-peptide ≥ 437.8 pmol/l      | -0.03                                  | -0.20 – 0.15  | 0.757    | <b>-0.36</b>                           | <b>-0.62 – -0.10</b> | <b>0.008</b>  | <b>-3.33</b>               | <b>-6.55 – -0.10</b> | <b>0.043</b> |
| IS <sub>HOMA</sub> ≤ 0.59     | -0.06                                  | -0.24 – -0.12 | 0.521    | -0.21                                  | -0.50 – 0.08         | 0.153         | -3.24                      | -6.66 – 0.19         | 0.064        |
| IS <sub>HOMA</sub> 0.58-0.85  | -0.10                                  | -0.27 – 0.08  | 0.285    | -0.24                                  | -0.52 – 0.05         | 0.101         | -1.87                      | -5.23 – 1.48         | 0.270        |
| IS <sub>HOMA</sub> > 0.85     | ref                                    |               |          | ref                                    |                      |               | ref                        |                      |              |

| <i>Predictors</i>             | <b>C 22:5 (n-3)</b> |                       |              | <b>C 22:6 (n-3)</b> |                |          |
|-------------------------------|---------------------|-----------------------|--------------|---------------------|----------------|----------|
|                               | $\beta$             | <i>CI</i>             | <i>p</i>     | $\beta$             | <i>CI</i>      | <i>p</i> |
| BMI < 25 kg/m <sup>2</sup>    | ref                 |                       |              | ref                 |                |          |
| BMI 25-29.9 kg/m <sup>2</sup> | 0.24                | -3.91 – 4.39          | 0.908        | 6.37                | -3.77 – 16.50  | 0.216    |
| BMI ≥ 30 kg/m <sup>2</sup>    | -4.50               | -11.68 – 2.68         | 0.217        | -3,075              | -20.62 – 14.47 | 0.729    |
| Leptin < 8.5 ng/ml            | ref                 |                       |              | ref                 |                |          |
| Leptin 8.5-15.3 ng/ml         | 2.97                | -1.43 – 7.37          | 0.183        | 1.73                | -9.14 – 12.60  | 0.753    |
| Leptin ≥ 15.3 ng/ml           | 0.09                | -4.34 – 4.52          | 0.969        | 1.12                | -9.83 – 12.06  | 0.840    |
| Glucose < 4.28 mmol/l         | ref                 |                       |              | ref                 |                |          |
| Glucose 4.28-4.97 mmol/l      | 1.31                | 3.12 – 5.73           | 0.560        | -8,152              | -18.90 – 2.59  | 0.136    |
| Glucose ≥ 4.97 mmol/l         | -0.89               | -6.08 – 4.30          | 0.734        | -3,513              | -16.12 – 9.09  | 0.582    |
| C-peptide < 315.4 pmol/l      | ref                 |                       |              | ref                 |                |          |
| C-peptide 315.4–437.8 pmol/l  | -3.51               | -7.83 – 0.80          | 0.109        | -3.57               | -14.21 – 7.07  | 0.507    |
| C-peptide ≥ 437.8 pmol/l      | <b>-4.93</b>        | <b>-9.34 – -0.52</b>  | <b>0.029</b> | -9.88               | -20.77 – 1.00  | 0.075    |
| IS <sub>HOMA</sub> ≤ 0.59     | <b>-5.37</b>        | <b>-10.08 - -0.67</b> | <b>0.26</b>  | -10.37              | -21.96 – 1.22  | 0.079    |
| IS <sub>HOMA</sub> 0.58-0.85  | -2.93               | -7.54 – 1.68          | 0.210        | -5.27               | -16.62 – 6.09  | 0.360    |
| IS <sub>HOMA</sub> >0.85      | ref                 |                       |              | ref                 |                |          |

D) *n*-6 PUFA

| <i>Predictors</i>             | <b>C 18:2 (<i>n</i>-6)</b> |                 |          | <b>C 18:3 (<i>n</i>-6) <sup>a</sup></b> |              |          | <b>C 20:2 (<i>n</i>-6) <sup>a</sup></b> |                       |              | <b>C 20:3 (<i>n</i>-6)</b> |                     |              |
|-------------------------------|----------------------------|-----------------|----------|-----------------------------------------|--------------|----------|-----------------------------------------|-----------------------|--------------|----------------------------|---------------------|--------------|
|                               | $\beta$                    | CI              | <i>p</i> | $\beta$                                 | CI           | <i>p</i> | $\beta$                                 | CI                    | <i>p</i>     | $\beta$                    | CI                  | <i>p</i>     |
| BMI < 25 kg/m <sup>2</sup>    | ref                        |                 |          | ref                                     |              |          | ref                                     |                       |              | ref                        |                     |              |
| BMI 25-29.9 kg/m <sup>2</sup> | -31.96                     | -88.61 – 24.70  | 0.266    | -0.08                                   | -0.28 – 0.11 | 0.395    | 0.11                                    | -0.05 – 0.26          | 0.177        | 4.27                       | -1.4 – 9.93         | 0.138        |
| BMI ≥ 30 kg/m <sup>2</sup>    | -40.28                     | -138.34 – 57.79 | 0.418    | -0.05                                   | -0.39 – 0.29 | 0.765    | 0.07                                    | -0.20 – 0.34          | 0.604        | 4.34                       | -5.47 – 14.14       | 0.383        |
| Leptin < 8.5 ng/ml            | ref                        |                 |          | ref                                     |              |          | ref                                     |                       |              | ref                        |                     |              |
| Leptin 8.5-15.3 ng/ml         | -23.98                     | -84.55 – 36.58  | 0.434    | 0.16                                    | -0.05 – 0.37 | 0.126    | -0.03                                   | -0.20 – 0.14          | 0.720        | 3.90                       | -2.9 – 9.08         | 0.309        |
| Leptin ≥ 15.3 ng/ml           | -61.06                     | -67.07 – 54.85  | 0.843    | 0.10                                    | -0.11 – 0.30 | 0.355    | -0.04                                   | -0.20 – 0.13          | 0.672        | <b>6.22</b>                | <b>0.19 – 12.25</b> | <b>0.043</b> |
| Glucose < 4.28 mmol/l         | ref                        |                 |          | ref                                     |              |          | ref                                     |                       |              | ref                        |                     |              |
| Glucose 4.28-4.97 mmol/l      | -2.467                     | -63.07 – 58.14  | 0.936    | 0.17                                    | -0.03 – 0.37 | 0.095    | <b>-0.20</b>                            | <b>-0.36 – -0.04</b>  | <b>0.015</b> | -3.04                      | -9.08 – 3.00        | 0.321        |
| Glucose ≥ 4.97 mmol/l         | -14.32                     | -85.42 – 56.78  | 0.691    | -0.01                                   | -0.25 – 0.22 | 0.920    | <b>-0.23</b>                            | <b>-0.42 – -0.045</b> | <b>0.016</b> | -4.09                      | -11.17 – 2.99       | 0.255        |
| C-peptide < 315.4 pmol/l      | ref                        |                 |          | ref                                     |              |          | ref                                     |                       |              | ref                        |                     |              |
| C-peptide 315.4–437.8 pmol/l  | -57.90                     | -65.65 – 54.07  | 0.848    | -0.08                                   | -0.29 – 0.12 | 0.428    | -0.11                                   | -0.27 – 0.05          | 0.187        | 0.05                       | -6 – 6.10           | 0.988        |
| C-peptide ≥ 437.8 pmol/l      | -36.56                     | -97.81 – 24.69  | 0.239    | 0.01                                    | -0.20 – 0.22 | 0.920    | <b>-0.18</b>                            | <b>-0.35 – -0.02</b>  | <b>0.031</b> | 0.8                        | -5.39 – 7           | 0.798        |
| IS <sub>HOMA</sub> ≤ 0.59     | -49.34                     | -113.58 – 14.90 | 0.131    | -0.12                                   | -0.34 – 0.10 | 0.296    | -0.16                                   | -0.33 – 0.02          | 0.085        | -0.31                      | -6.90 – 6.27        | 0.925        |
| IS <sub>HOMA</sub> 0.58-0.85  | 11.10                      | -51.85 – 74.06  | 0.727    | -0.08                                   | -0.29 – 0.14 | 0.472    | -0.08                                   | -0.25 – 0.10          | 0.394        | -0.23                      | -6.68 – 6.22        | 0.944        |
| IS <sub>HOMA</sub> ≤ 0.85     | ref                        |                 |          | ref                                     |              |          | ref                                     |                       |              | ref                        |                     |              |

| <i>Predictors</i>             | <b>C 20:4 (n-6)</b> |                |          | <b>C 22:4 (n-6)</b> |                      |               | <b>C 22:5 (n-6)</b> |               |          |
|-------------------------------|---------------------|----------------|----------|---------------------|----------------------|---------------|---------------------|---------------|----------|
|                               | $\beta$             | <i>CI</i>      | <i>p</i> | $\beta$             | <i>CI</i>            | <i>p</i>      | $\beta$             | <i>CI</i>     | <i>p</i> |
| BMI < 25 kg/m <sup>2</sup>    | ref                 |                |          | ref                 |                      |               | ref                 |               |          |
| BMI 25-29.9 kg/m <sup>2</sup> | 16.50               | -4.16 – 37.17  | 0.116    | 0.93                | -0.04 – 1.89         | 0.060         | 0.00                | -1.67 – 1.67  | 0.997    |
| BMI ≥ 30 kg/m <sup>2</sup>    | 20.20               | -15.57 – 55.97 | 0.266    | 0.75                | -0.93 – 2.42         | 0.379         | -1.04               | -3.93 – 1.85  | 0.479    |
| Leptin < 8.5 ng/ml            | ref                 |                |          | ref                 |                      |               | ref                 |               |          |
| Leptin 8.5-15.3 ng/ml         | -2.97               | -25.10 – 19.15 | 0.790    | -0.02               | -1.06 – 1.03         | 0.975         | 0.88                | -0.89 – 2.65  | 0.328    |
| Leptin ≥ 15.3 ng/ml           | 11.54               | -10.73 – 33.81 | 0.307    | 0.33                | -0.72 – 1.38         | 0.540         | 0.05                | -1.73 – 1.83  | 0.956    |
| Glucose < 4.28 mmol/l         | ref                 |                |          | ref                 |                      |               | ref                 |               |          |
| Glucose 4.28-4.97 mmol/l      | -1.01               | -23.16 – 21.14 | 0.928    | -0.44               | -1.44 – 0.56         | 0.382         | -0.87               | -2.63 – 0.88  | 0.326    |
| Glucose ≥ 4.97 mmol/l         | -9.13               | -35.12 – 16.86 | 0.488    | <b>-1.84</b>        | <b>-3.01 – -0.67</b> | <b>0.002*</b> | -1.78               | -3.84 – 0.27  | 0.088    |
| C-peptide < 315.4 pmol/l      | ref                 |                |          | ref                 |                      |               | ref                 |               |          |
| C-peptide 315.4–437.8 pmol/l  | -8.25               | -30.31 – 13.81 | 0.461    | -0.12               | -1.16 – 0.91         | 0.815         | -1.70               | -3.44 – 0.04  | 0.055    |
| C-peptide ≥ 437.8 pmol/l      | 1.10                | -21.48 – 23.67 | 0.924    | 0.05                | -1.01 – 1.11         | 0.929         | -1.29               | -3.07 – 0.49  | 0.153    |
| IS <sub>HOMA</sub> ≤ 0.59     | -3.13               | -27.02 – 20.75 | 0.464    | -0.39               | -1.51 – 0.72         | 0.487         | -1.56               | -3.46 – -0.34 | 0.107    |
| IS <sub>HOMA</sub> 0.58-0.85  | 8.69                | -14.72 – 32.09 | 0.464    | 0.45                | -0.64 – 1.54         | 0.418         | -1.38               | -3.24 – 0.48  | 0.144    |
| IS <sub>HOMA</sub> > 0.85     | ref                 |                |          | ref                 |                      |               | ref                 |               |          |

BMI: Body mass index; IS<sub>HOMA</sub>: Homeostatic model assessment of insulin sensitivity; SFA: Saturated fatty acids; MUFA: Monounsaturated fatty acids. PUFA: polyunsaturated fatty acids.  $\beta$ : coefficient estimate; CI: Confidence interval; ref: reference category. Adjusted for: gestational age (days), maternal age (years) and processing time (minutes). <sup>a</sup> ln-transformed variable. Non-normally distributed variables were ln-transformed to meet the requirements of multivariate linear regression analysis. When the outcome variable (i.e. fatty acid) is ln-transformed, the  $\beta$  estimate needs to be exponentiated and subtracted by 1. Bold font indicates  $p < 0.05$ . \* Statistically significant after correcting for multiple testing using Benjamin Hochberg procedure (FDR=0.2).

**Table S2.** Comparison of maternal characteristics, metabolic parameters and concentrations of fatty acid classes between total cohort and subcohort, in which fetal sex was determined

|                                   | Total cohort n=123 |                       | Subpopulation n=83 |                       | <i>p</i> -value |
|-----------------------------------|--------------------|-----------------------|--------------------|-----------------------|-----------------|
|                                   | Mean $\pm$ SD      | Median (IQR)          | Mean $\pm$ SD      | Median (IQR)          |                 |
| Age ( <i>years</i> )              | 31.4 ( $\pm$ 7.2)  |                       | 30.6 ( $\pm$ 7.5)  |                       | NS              |
| Gestational age ( <i>days</i> )   | 51.0 ( $\pm$ 15.4) |                       | 52.9 ( $\pm$ 15.6) |                       | NS              |
| BMI ( <i>kg/m</i> <sup>2</sup> )  |                    | 22.6 (21.0 - 24.6)    |                    | 22.9 (21.5 - 24.9)    | NS              |
| <b>Metabolic parameters</b>       |                    |                       |                    |                       |                 |
| Leptin ( <i>ng/ml</i> )           |                    | 11.8 (8.5 - 15.3)     |                    | 12.8 (8.7 - 16.0)     | NS              |
| Glucose ( <i>mmol/l</i> )         | 4.76 ( $\pm$ 0.85) |                       | 4.68 ( $\pm$ 0.74) |                       | NS              |
| C-peptide ( <i>pmol/l</i> )       |                    | 371.0 (315.4 - 437.8) |                    | 376.8 (310.6 - 440.0) | NS              |
| IS <sub>HOMA</sub>                |                    | 0.74 (0.59 - 0.85)    |                    | 0.74 (0.59 - 0.86)    | NS              |
| Total fatty acids ( <i>mg/l</i> ) | 2737.0 $\pm$ 436.8 |                       | 2724.0 $\pm$ 415.4 |                       | NS              |
| SFA ( <i>mg/l</i> )               | 921.6 $\pm$ 158.0  |                       | 918.9 $\pm$ 148.2  |                       | NS              |
| MUFA ( <i>mg/l</i> )              | 611.6 $\pm$ 134.7  |                       | 610.5 $\pm$ 132.8  |                       | NS              |
| <i>n</i> -3 PUFA ( <i>mg/l</i> )  | 159.2 $\pm$ 33.1   |                       | 158.0 $\pm$ 28.5   |                       | NS              |
| <i>n</i> -6 PUFA ( <i>mg/l</i> )  | 1044.6 $\pm$ 173.2 |                       | 1036.9 $\pm$ 161.8 |                       | NS              |

BMI: Body mass index; IS<sub>HOMA</sub>: Homeostatic model assessment of insulin sensitivity; SFA: Saturated fatty acids; MUFA: Monounsaturated fatty acids. PUFA: polyunsaturated fatty acids. SD: standard deviation; IQR: Interquartile range. Mann-Whitney U Test. NS: Not-statistically significant (*p* > 0.05).

**Table S3.** Sensitivity analysis, excluding data of women with glucose values > 7 mmol/l. Associations between individual BMI, leptin, glucose, C-peptide and IS<sub>HOMA</sub> and SFA (A), MUFA (B), *n*-3 PUFA (C) and *n*-6 PUFA (D).

A) SFA

| <i>Predictors</i>          | <b>C 14:0<sup>a</sup></b> |              |          | <b>C 16:0<sup>a</sup></b> |                      |              | <b>C 18:0</b> |                |          |
|----------------------------|---------------------------|--------------|----------|---------------------------|----------------------|--------------|---------------|----------------|----------|
|                            | $\beta$                   | <i>CI</i>    | <i>p</i> | $\beta$                   | <i>CI</i>            | <i>p</i>     | $\beta$       | <i>CI</i>      | <i>p</i> |
| Glucose < 4.28 mmol/l      | ref                       |              |          | ref                       |                      |              | ref           |                |          |
| Glucose 4.28-4.97 mmol/l   | 0.07                      | -0.13 – 0.27 | 0.516    | -0.01                     | -0.10 – 0.08         | 0.783        | 3.37          | -15.88 – 22.62 | 0.730    |
| Glucose $\geq$ 4.97 mmol/l | -0.15                     | -0.39 – 0.09 | 0.207    | <b>-0.12</b>              | <b>-0.22 – -0.01</b> | <b>0.033</b> | -10.07        | -32.73 – 12.60 | 0.381    |

B) MUFA

| <i>Predictors</i>          | <b>C 16:1<sup>a</sup></b> |              |          | <b>C 18:1 (<i>n</i>-9)</b> |                 |          | <b>C 22:1 (<i>n</i>-9)</b> |              |          |
|----------------------------|---------------------------|--------------|----------|----------------------------|-----------------|----------|----------------------------|--------------|----------|
|                            | $\beta$                   | <i>CI</i>    | <i>p</i> | $\beta$                    | <i>CI</i>       | <i>p</i> | $\beta$                    | <i>CI</i>    | <i>p</i> |
| Glucose < 4.28 mmol/l      | ref                       |              |          | ref                        |                 |          | ref                        |              |          |
| Glucose 4.28-4.97 mmol/l   | 0.11                      | -0.08 – 0.30 | 0.254    | -18.67                     | -69.05 – 31.71  | 0.464    | -0.69                      | -1.94 – 0.57 | 0.280    |
| Glucose $\geq$ 4.97 mmol/l | -0.18                     | -0.40 – 0.05 | 0.125    | -43.80                     | -103.11 – 15.52 | 0.146    | 0.94                       | -0.54 – 2.42 | 0.210    |



C) n-3 PUFA

| <i>Predictors</i>          | <b>C 18:3 (<i>n</i>-3)<sup>a</sup></b> |              |          | <b>C 20:3 (<i>n</i>-3)<sup>a</sup></b> |              |          | <b>C 20:5 (<i>n</i>-3)</b> |              |          |
|----------------------------|----------------------------------------|--------------|----------|----------------------------------------|--------------|----------|----------------------------|--------------|----------|
|                            | $\beta$                                | <i>CI</i>    | <i>p</i> | $\beta$                                | <i>CI</i>    | <i>p</i> | $\beta$                    | <i>CI</i>    | <i>p</i> |
| Glucose < 4.28 mmol/l      | ref                                    |              |          | ref                                    |              |          | ref                        |              |          |
| Glucose 4.28-4.97 mmol/l   | 0.01                                   | -0.16 – 0.18 | 0.898    | -0.09                                  | -0.37 – 0.19 | 0.519    | -0.47                      | -3.68 – 2.75 | 0.775    |
| Glucose $\geq$ 4.97 mmol/l | 0.01                                   | -0.19 – 0.21 | 0.945    | -0.02                                  | -0.34 – 0.31 | 0.913    | 1,35                       | -2.44 – 5.13 | 0.482    |

| <i>Predictors</i>          | <b>C 22:5 (<i>n</i>-3)</b> |              |          | <b>C 22:6 (<i>n</i>-3)</b> |               |          |
|----------------------------|----------------------------|--------------|----------|----------------------------|---------------|----------|
|                            | $\beta$                    | <i>CI</i>    | <i>p</i> | $\beta$                    | <i>CI</i>     | <i>p</i> |
| Glucose < 4.28 mmol/l      | ref                        |              |          | ref                        |               |          |
| Glucose 4.28-4.97 mmol/l   | -1.31                      | -3.15 – 5.78 | 0.561    | -8.25                      | -19.04 – 2.54 | 0.133    |
| Glucose $\geq$ 4.97 mmol/l | -0.83                      | -6.08 – 4.42 | 0.755    | -3.04                      | -15.75 – 9.67 | 0.636    |

#### D) n-6 PUFA

| <i>Predictors</i>          | <b>C 18:2 (n-6)</b> |                |          | <b>C 18:3 (n-6)<sup>a</sup></b> |              |          | <b>C 20:2 (n-6)<sup>a</sup></b> |                      |              | <b>C 20:3 (n-6)</b> |               |          |
|----------------------------|---------------------|----------------|----------|---------------------------------|--------------|----------|---------------------------------|----------------------|--------------|---------------------|---------------|----------|
|                            | $\beta$             | CI             | <i>p</i> | $\beta$                         | CI           | <i>p</i> | $\beta$                         | CI                   | <i>p</i>     | $\beta$             | CI            | <i>p</i> |
| Glucose < 4.28 mmol/l      | ref                 |                |          | ref                             |              |          | ref                             |                      |              | ref                 |               |          |
| Glucose 4.28-4.97 mmol/l   | -2.17               | -63.25 – 59.91 | 0.944    | 0.18                            | -0.06 – 0.36 | 0.058    | <b>-0.20</b>                    | <b>-0.36 – -0.04</b> | <b>0.015</b> | -3.04               | -9.10 – 3.05  | 0.326    |
| Glucose $\geq$ 4.97 mmol/l | -15.90              | -87.82 – 56.02 | 0.662    | -0.01                           | -0.23 – 0.21 | 0.924    | <b>-0.25</b>                    | <b>-0.43 – -0.06</b> | <b>0.011</b> | -3.09               | -11.06 – 3.25 | 0.282    |

| <i>Predictors</i>          | <b>C 20:4 (n-6)</b> |                |          | <b>C 22:4 (n-6)</b> |                      |              | <b>C 22:5 (n-6)</b> |              |          |
|----------------------------|---------------------|----------------|----------|---------------------|----------------------|--------------|---------------------|--------------|----------|
|                            | $\beta$             | CI             | <i>p</i> | $\beta$             | CI                   | <i>p</i>     | $\beta$             | CI           | <i>p</i> |
| Glucose < 4.28 mmol/l      | ref                 |                |          | ref                 |                      |              | ref                 |              |          |
| Glucose 4.28-4.97 mmol/l   | -1.06               | -23.27 – 21.16 | 0.925    | -0.45               | -1.45 – 0.56         | 0.382        | -0.86               | -2.63 – 0.90 | 0.335    |
| Glucose $\geq$ 4.97 mmol/l | -7.81               | -33.97 – 18.34 | 0.555    | <b>-1.82</b>        | <b>-3.00 – -0.63</b> | <b>0.003</b> | -1.80               | -3.88 – 0.28 | 0.088    |

BMI: Body mass index; IS<sub>HOMA</sub>: Homeostatic model assessment of insulin sensitivity; SFA: Saturated fatty acids; MUFA: Monounsaturated fatty acids. PUFA: polyunsaturated fatty acids.  $\beta$ : coefficient estimate; CI: Confidence interval; ref: reference category. Adjusted for: gestational age (days), maternal age (years) and processing time (minutes). <sup>a</sup> ln-transformed variable. Non-normally distributed variables were ln-transformed to meet the requirements of multivariate linear regression analysis. When the outcome variable (i.e. fatty acid) is ln-transformed, the  $\beta$  estimate needs to be exponentiated and subtracted by 1. Bold font indicates  $p < 0.05$ . The associations lost significance after correcting for multiple testing using Benjamin Hochberg procedure (FDR=0.2).

**Table S4.** Comparison of maternal characteristics, metabolic parameters and concentrations of fatty acid classes between mothers bearing female and male fetuses.

|                                   | Mothers bearing female fetuses n=46 |                           | Mothers bearing male fetuses n=37 |                           |                 |
|-----------------------------------|-------------------------------------|---------------------------|-----------------------------------|---------------------------|-----------------|
|                                   | Mean $\pm$ SD                       | Median (IQR)              | Mean $\pm$ SD                     | Median (IQR)              | <i>p</i> -value |
| Age ( <i>years</i> )              | 32 ( $\pm$ 7.3)                     |                           | 29 ( $\pm$ 7.4)                   |                           | NS              |
| Gestational age ( <i>days</i> )   | 51.5 ( $\pm$ 15.5)                  |                           | 54.6 ( $\pm$ 15.7)                |                           | NS              |
| BMI ( $\text{kg}/\text{m}^2$ )    |                                     | <b>23.6 (22.7 – 25.9)</b> |                                   | <b>22.0 (21.0 – 23.1)</b> | <b>&lt;0.05</b> |
| <b>Metabolic parameters</b>       |                                     |                           |                                   |                           |                 |
| Leptin ( <i>ng/ml</i> )           |                                     | 15.2 (11.6 – 17.5)        |                                   | 11.5 (8.4 - 14.3)         | NS              |
| Glucose ( <i>mmol/l</i> )         | 4.66 ( $\pm$ 0.72)                  |                           | 4.73 ( $\pm$ 0.75)                |                           | NS              |
| C-peptide ( <i>pmol/l</i> )       |                                     | 402.3 (316.0 – 445.7)     |                                   | 398.6 (293.4 – 400.4)     | NS              |
| IS <sub>HOMA</sub>                |                                     | 0.69 (0.57 - 0.90)        |                                   | 0.81 (0.67 - 0.87)        | NS              |
| Total fatty acids ( <i>mg/l</i> ) | 2704.9 $\pm$ 458.8                  |                           | 2748.2 $\pm$ 359.0                |                           | NS              |
| SFA ( <i>mg/l</i> )               | 915.2 $\pm$ 160.5                   |                           | 923.4 $\pm$ 133.3                 |                           | NS              |
| MUFA ( <i>mg/l</i> )              | 606.1 $\pm$ 138.6                   |                           | 615.9 $\pm$ 126.9                 |                           | NS              |
| <i>n</i> -3 PUFA ( <i>mg/l</i> )  | 158.8 $\pm$ 31.9                    |                           | 157.1 $\pm$ 24.0                  |                           | NS              |
| <i>n</i> -6 PUFA ( <i>mg/l</i> )  | 1024.7 $\pm$ 174.6                  |                           | 1051.9 $\pm$ 145.2                |                           | NS              |

BMI: Body mass index; IS<sub>HOMA</sub>: Homeostatic model assessment of insulin sensitivity; SFA: Saturated fatty acids; MUFA: Monounsaturated fatty acids. PUFA: polyunsaturated fatty acids. SD: standard deviation; IQR: Interquartile range. Mann-Whitney U Test. NS: Non-statistically significant ( $p > 0.05$ ). Statistically significant results in bold. Note: Although the concentration of individual fatty acids, TFA, SFA, MUFA and *n*-3 and *n*-6 PUFA did not significantly differ between female and male bearing mothers, there was a significant interaction ( $p < 0.1$ ) between fetal sex and C-peptide, fetal sex and IS<sub>HOMA</sub> and fetal sex and BMI in the model for *n*-3 PUFA (adjusted for processing time, maternal age and gestational age).

**Table S5.** Effect size of the association between C-peptide and docosahexaenoic acid (DHA) in the female and male subgroups.

|                | Female-bearing mothers<br>(n=46) |                 | Male-bearing mothers<br>(n=37) |                 |
|----------------|----------------------------------|-----------------|--------------------------------|-----------------|
|                | Effect-size                      | <i>p</i> -value | Effect-size                    | <i>p</i> -value |
| <b>Model 1</b> | 23.3%                            | <0.05           | 13.5%                          | NS              |
| <b>Model 2</b> | 24.3%                            | NS              | 13.5%                          | NS              |
| <b>Model 3</b> | 24.1%                            | NS              | 15.4%                          | NS              |

Model 1: Adjusted for gestational age, maternal age and processing time

Model 2: Model 1 + Adjustment for BMI

Model 3: Model 1 + Adjustment for leptin

NS: Not statistically significant ( $p > 0.05$ );

**Figure S1. Association of fasting glucose with individual SFA.** Measures of maternal fasting glucose were categorized into tertiles and the estimates compared to the referent category: glucose < 4.28 mmol/l. Model adjusted for gestational age (days), maternal age (years) and processing time (minutes). \*  $p < 0.05$ . The association lost significance after correcting for multiple testing using Benjamin Hochberg procedure (FDR=0.2) (see **Table S1**).

A) Glucose

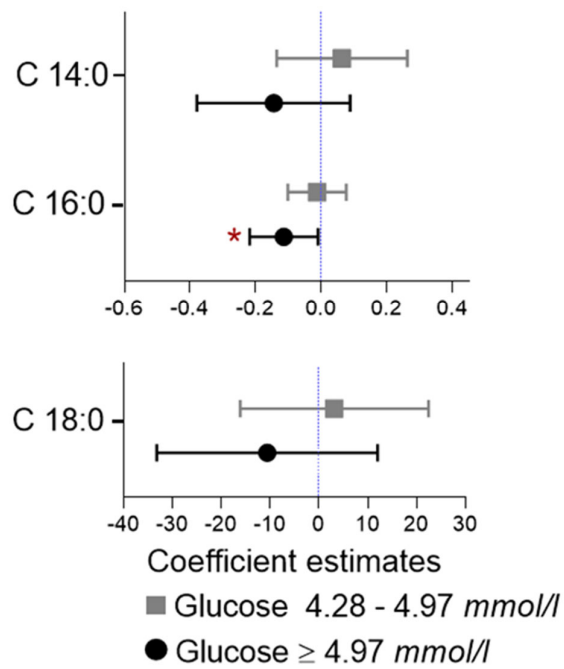

**Figure S2. Sensitivity analysis: full cohort excluding women with glucose values > 7 mmol/l.** Measures of maternal fasting glucose were categorized into tertiles and the estimates compared to the referent category: glucose < 4.28 mmol/l. Model adjusted for gestational age (days), maternal age (years) and processing time (minutes). \*  $p < 0.05$ . There were no significant differences after correction for multiple testing (FDR = 0.2).

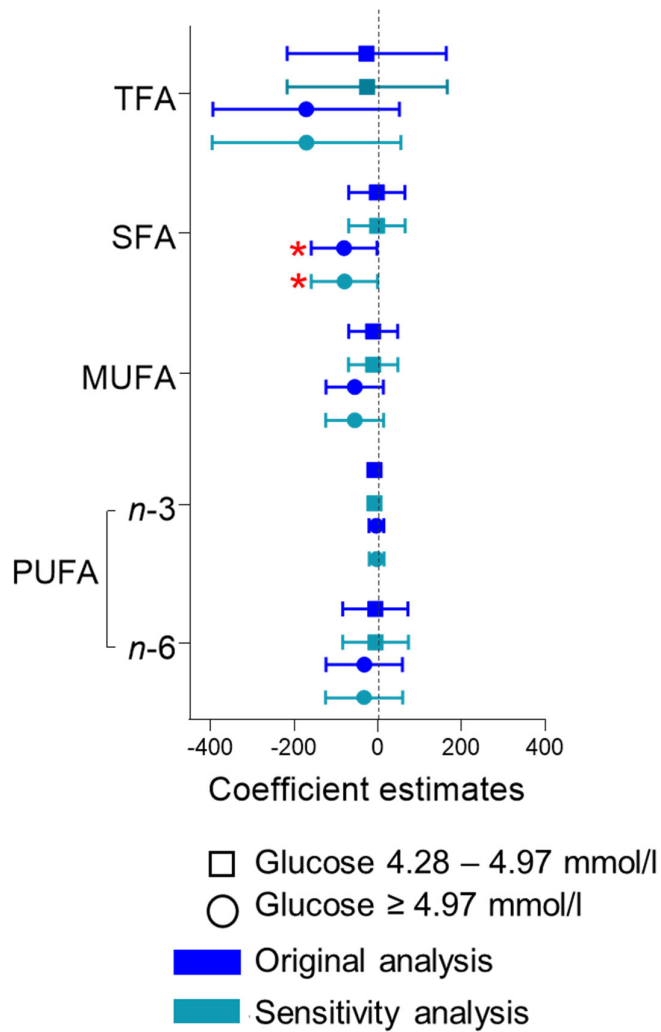

Supplement: s1 [file s1]
